# Supplementary material for: Mass Spectrometry-Based Investigation of Sugarcane Exposed to Five Different Pesticides
Source: MDPI journal article supplement (doi:10.3390/life13041034), 2023-04-17

Supporting Information

Figure S1. Randomized block design with five replications.

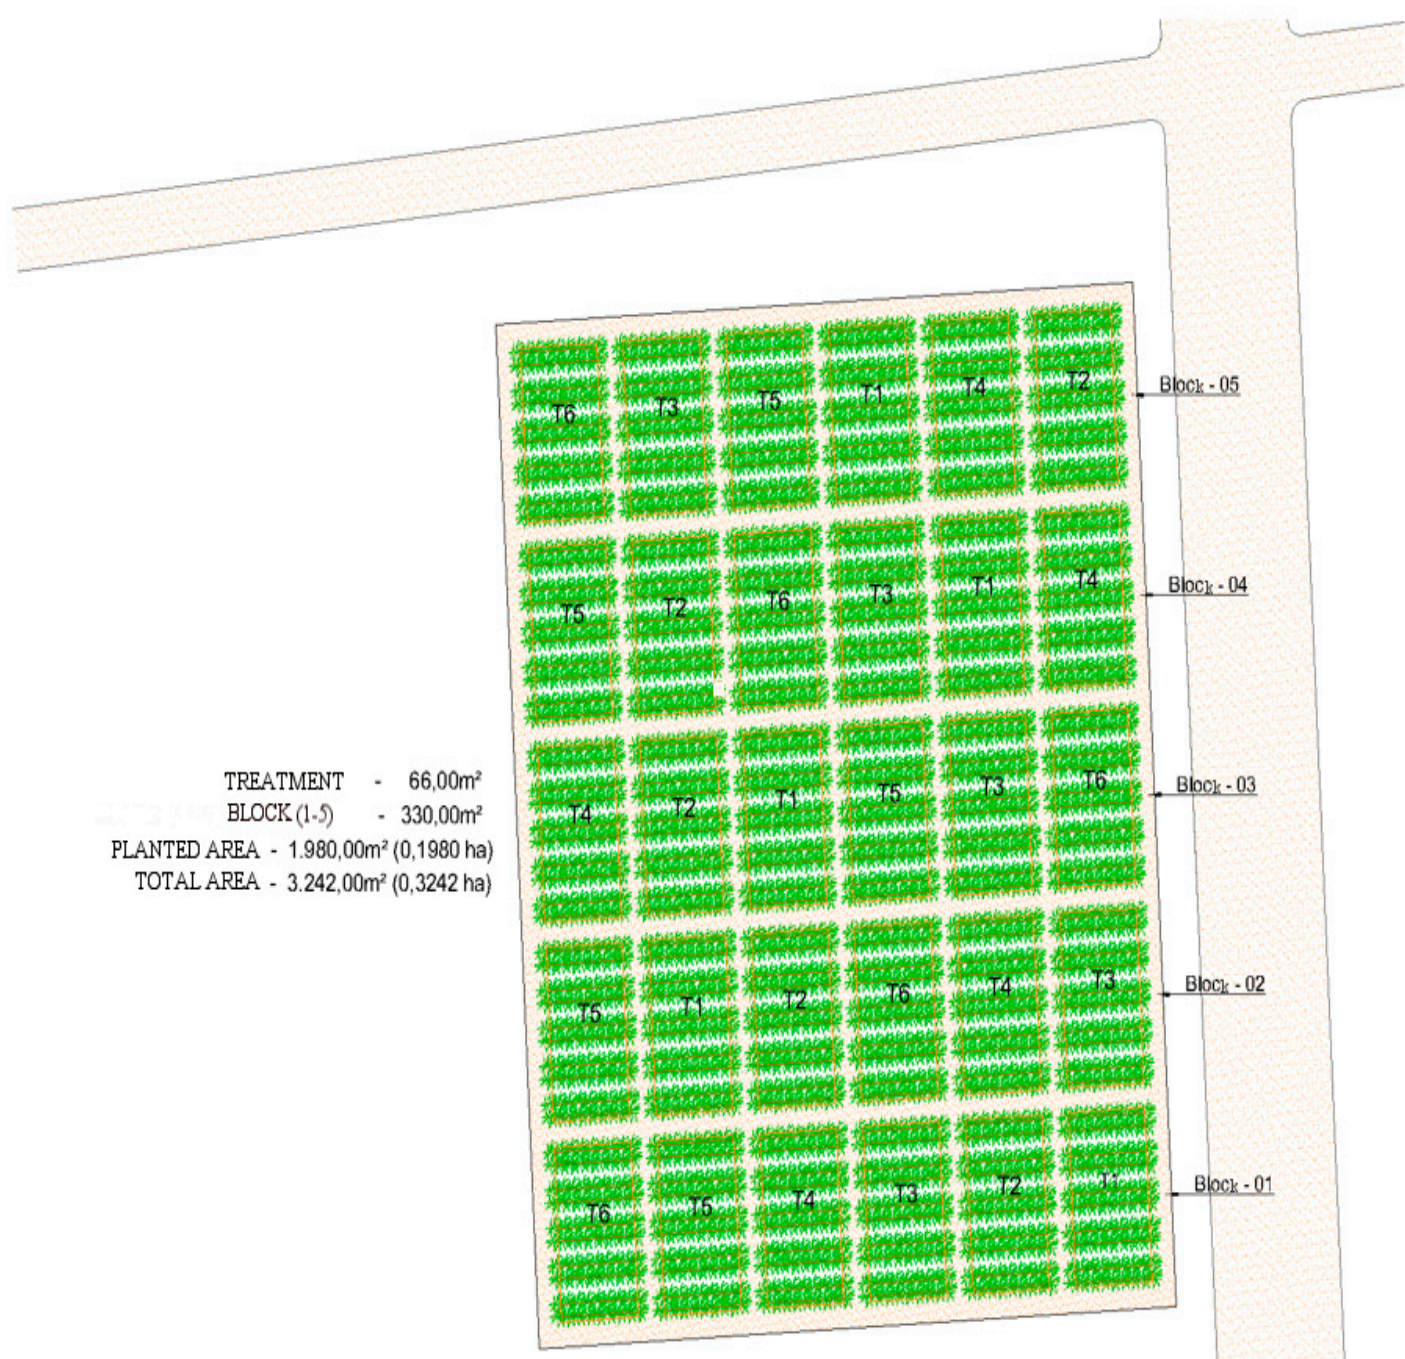

**Table S1.** Results of Total Recoverable Sugar (TRS) analyses for each treatment (T).

|                           | <b>T1</b> | <b>TRS</b>    | <b>T2</b> | <b>TRS</b>    | <b>T3</b> | <b>TRS</b>   | <b>T4</b> | <b>TRS</b>   | <b>T5</b> | <b>TRS</b>    | <b>T6</b> | <b>TRS</b>    |
|---------------------------|-----------|---------------|-----------|---------------|-----------|--------------|-----------|--------------|-----------|---------------|-----------|---------------|
| 28/11/2019                | <b>B1</b> | 150.13        | <b>B1</b> | 157.91        | <b>B5</b> | 143.9        | <b>B1</b> | 158.83       | <b>B2</b> | 157.66        | <b>B1</b> | 163.21        |
| 28/11/2019                | <b>B2</b> | 161.88        | <b>B2</b> | 144.09        | <b>B1</b> | 153.6        | <b>B2</b> | 152.54       | <b>B3</b> | 156.85        | <b>B2</b> | 172.37        |
| 28/11/2019                | <b>B3</b> | 160.16        | <b>B3</b> | 154.91        | <b>B2</b> | 171.9        | <b>B3</b> | 147.24       | <b>B4</b> | 152.88        | <b>B3</b> | 144.02        |
| 28/11/2019                | <b>B4</b> | 165.75        | <b>B4</b> | 160.42        | <b>B3</b> | 152.16       | <b>B4</b> | 160.44       | <b>B5</b> | 159.1         | <b>B4</b> | 154.79        |
| 28/11/2019                | <b>B5</b> | 156.95        | <b>B5</b> | 149.57        | <b>B4</b> | 155.85       | <b>B5</b> | 148.48       | <b>B1</b> | 151.28        | <b>B5</b> | 160.72        |
| 09/01/2020                | <b>B1</b> | 148.58        | <b>B1</b> | 155.1         | <b>B1</b> | 154.33       | <b>B1</b> | 162.08       | <b>B1</b> | 154.14        | <b>B1</b> | 154.67        |
| 09/01/2020                | <b>B2</b> | 156.64        | <b>B2</b> | 147.74        | <b>B2</b> | 138.13       | <b>B2</b> | 152.91       | <b>B2</b> | 159.58        | <b>B2</b> | 160.95        |
| 09/01/2020                | <b>B3</b> | 149.54        | <b>B3</b> | 156.3         | <b>B3</b> | 168.95       | <b>B3</b> | 158.2        | <b>B3</b> | 155.93        | <b>B3</b> | 154.93        |
| 09/01/2020                | <b>B4</b> | 165           | <b>B4</b> | 153.38        | <b>B4</b> | 140.85       | <b>B4</b> | 159.34       | <b>B4</b> | 158.5         | <b>B4</b> | 155.33        |
| 09/01/2020                | <b>B5</b> | 148.75        | <b>B5</b> | 158.6         | <b>B5</b> | 151.79       | <b>B5</b> | 152.05       | <b>B5</b> | 155.6         | <b>B5</b> | 150.85        |
| 05/11/2020                | <b>B2</b> | 157.49        | <b>B5</b> | 163.12        | <b>B4</b> | 164.29       | <b>B4</b> | 154.37       | <b>B4</b> | 163.9         | <b>B5</b> | 156.21        |
| 05/11/2020                | <b>B5</b> | 151.89        | <b>B3</b> | 148.86        | <b>B5</b> | 152.44       | <b>B5</b> | 151.70       | <b>B1</b> | 159.03        | <b>B3</b> | 148.92        |
| 05/11/2020                | <b>B3</b> | 170.10        | <b>B4</b> | 141.31        | <b>B3</b> | 158.62       | <b>B3</b> | 177.18       | <b>B2</b> | 161.5         | <b>B4</b> | 136.68        |
| 05/11/2020                | <b>B1</b> | 140.41        | <b>B1</b> | 151.22        | <b>B1</b> | 158.70       | <b>B1</b> | 151.86       | <b>B3</b> | 166.32        | <b>B1</b> | 156.32        |
| 05/11/2020                | <b>B4</b> | 169.67        | <b>B2</b> | 155.19        | <b>B2</b> | 157.15       | <b>B2</b> | 151.54       | <b>B5</b> | 144.6         | <b>B2</b> | 156.72        |
| <b>Average</b>            | -         | <b>156.86</b> | -         | <b>153.18</b> | -         | <b>154.8</b> | -         | <b>155.9</b> | -         | <b>157.12</b> | -         | <b>155.11</b> |
| <b>Standard deviation</b> | -         | <b>8.37</b>   | -         | <b>5.66</b>   | -         | <b>8.78</b>  | -         | <b>7.11</b>  | -         | <b>5.1</b>    | -         | <b>7.97</b>   |

\*B - Block

**Figure S2.** (A) Base peak chromatogram (BPC) in negative ion mode of T1 (collection 4). (B). 2D Expansion showing the main ions present in sugarcane stem extract between 4–7.0 min by HPLC-DAD-ESI-MS<sup>n</sup>.

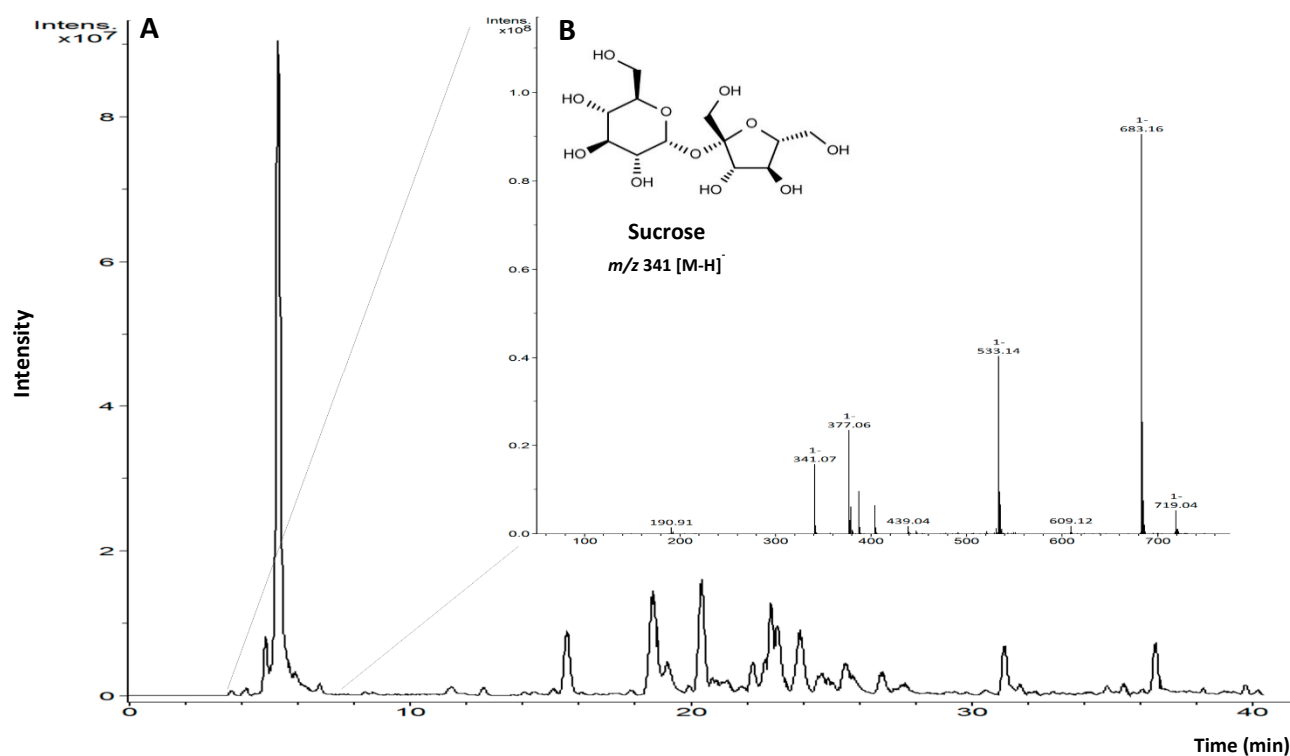

**Figure S3.** Expansion of the Base peak chromatogram (BPC) in negative ion mode between 4–7.0 min of T1 to T6. (collection 4) by HPLC-DAD-ESI-MS<sup>n</sup>.

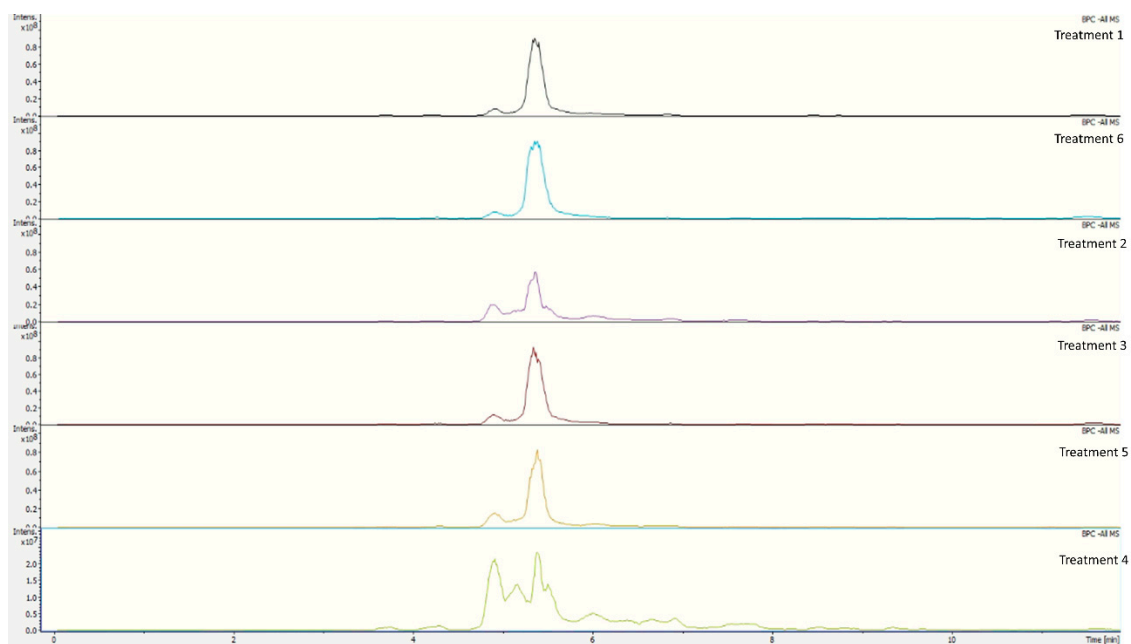

**Figure S4.** Graph of PCA scores (**left**) and loadings plots (PC1 vs. PC2) (**right**) for treatments 2 (red) and 4 (blue) analyzed by mass spectrometry.

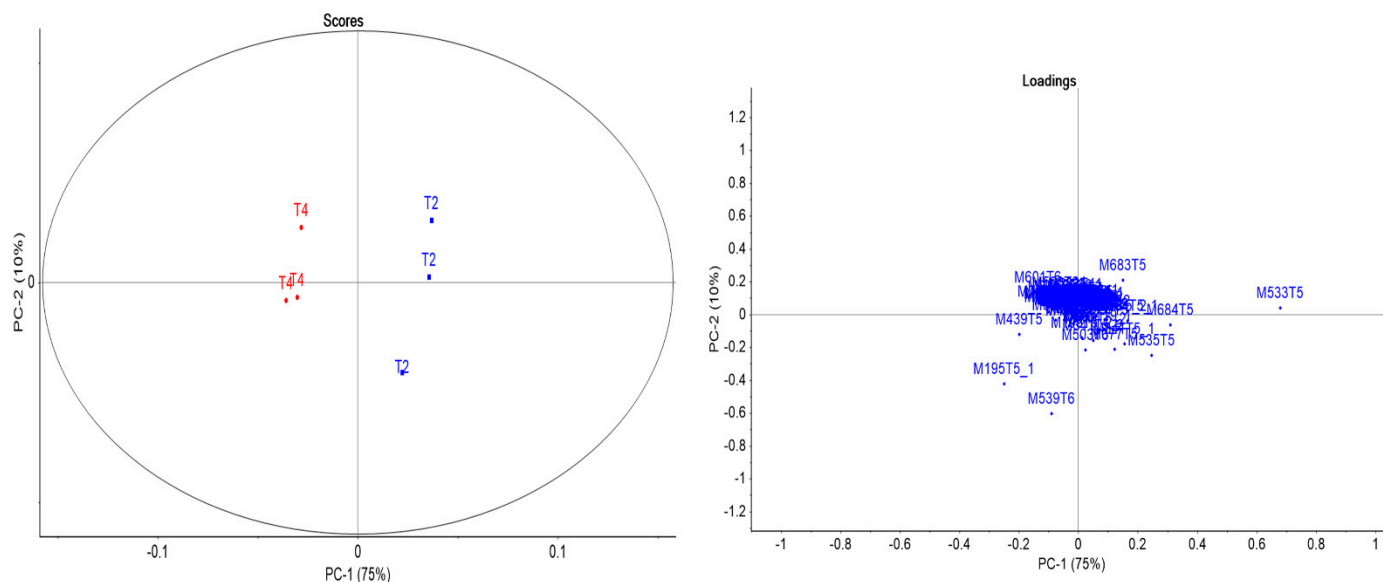

**Figure S5** Graph of PCA scores (**left**) and loadings plots (PC1 vs. PC2) (**right**) for treatments 3 (red) and 6 (green) and 1 (blue) analyzed by mass spectrometry.

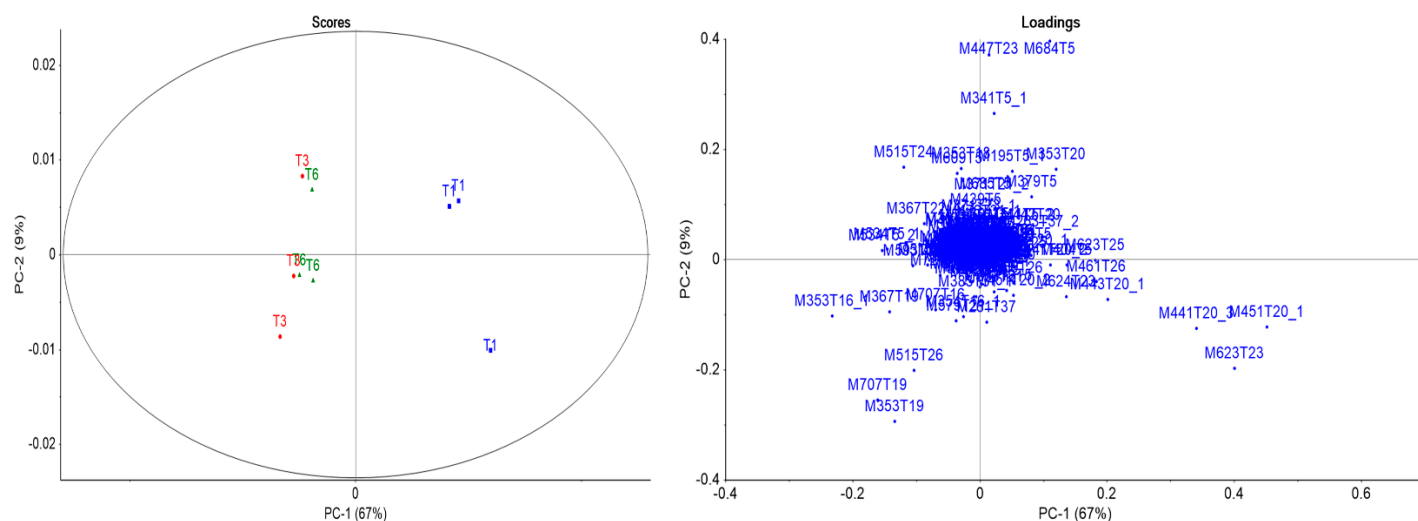

**Figure S6.** Graph of PCA scores (**left**) and loadings plots (PC1 vs. PC2) (**right**) for treatments 3 (blue) and 6 (red) analyzed by mass spectrometry.

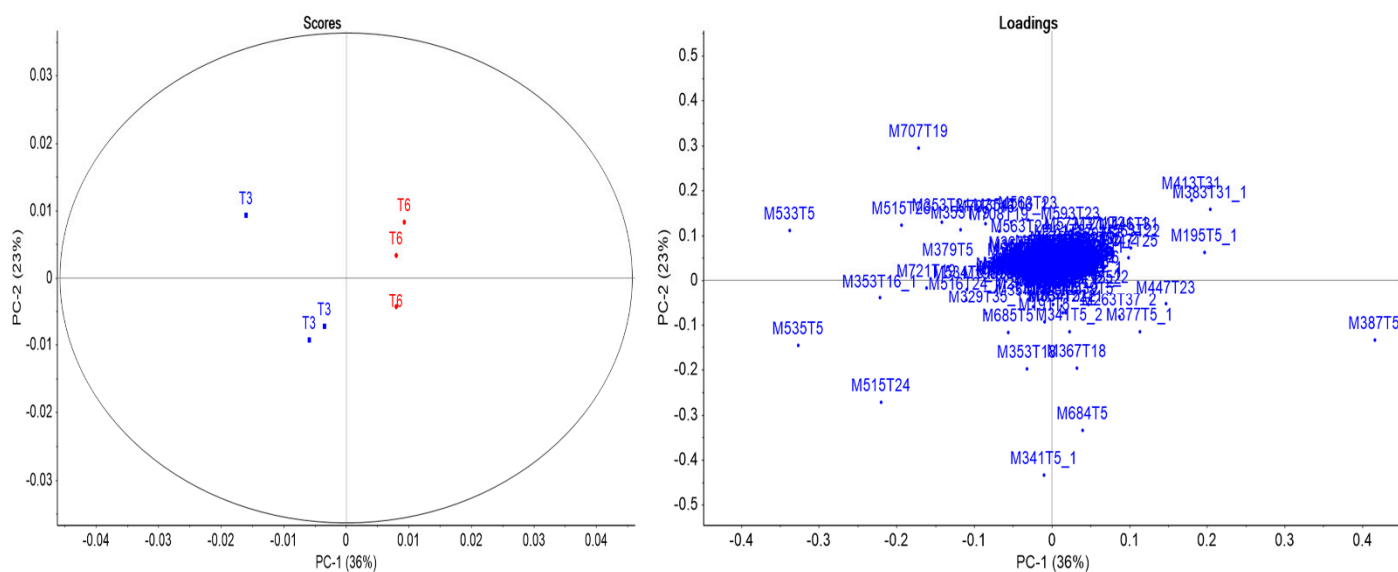

**Figure S7.** HRMS spectra of the main features annotated and listed in table 3. All the figures contain the molecular formula and retention time of each feature.

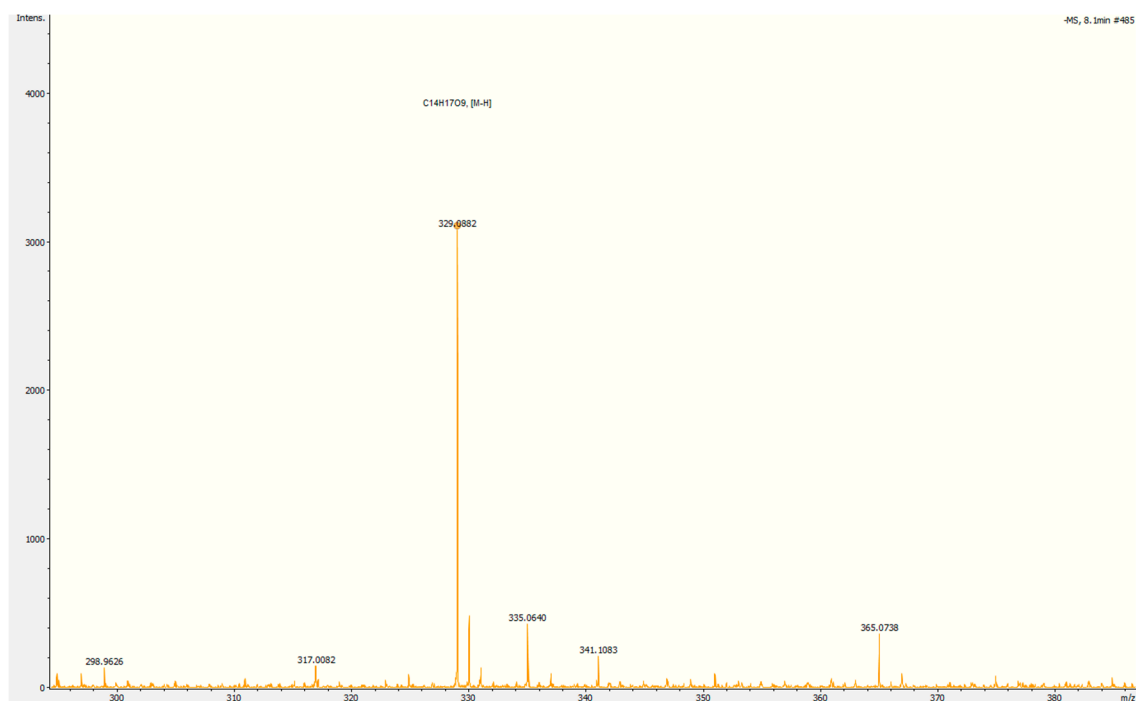

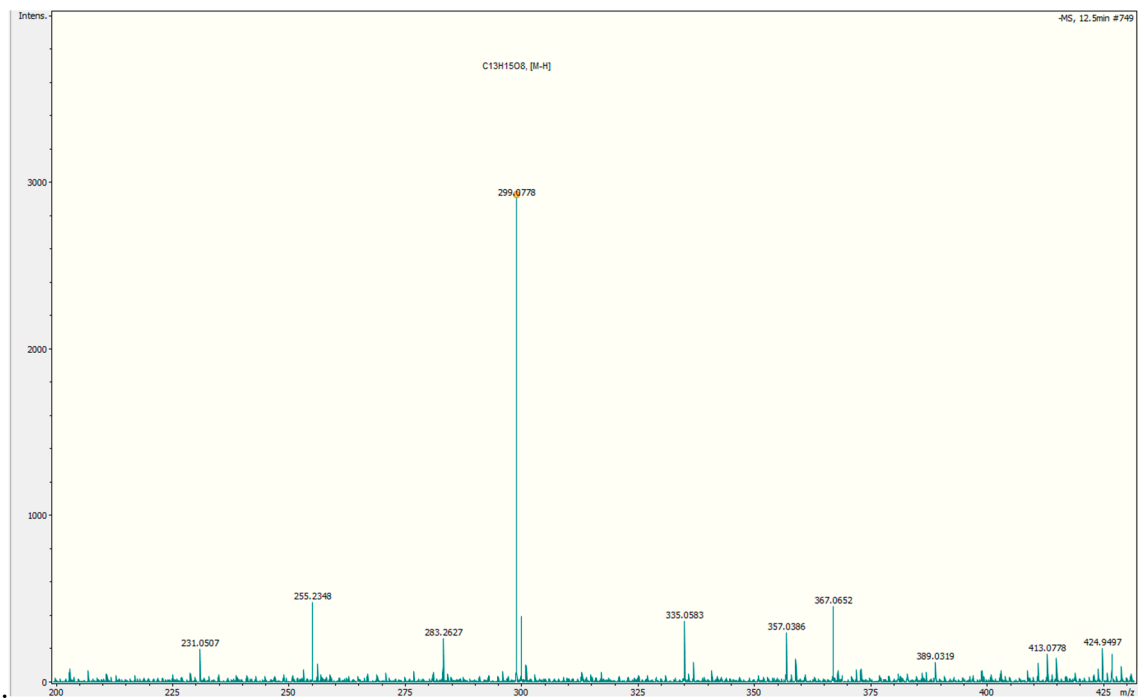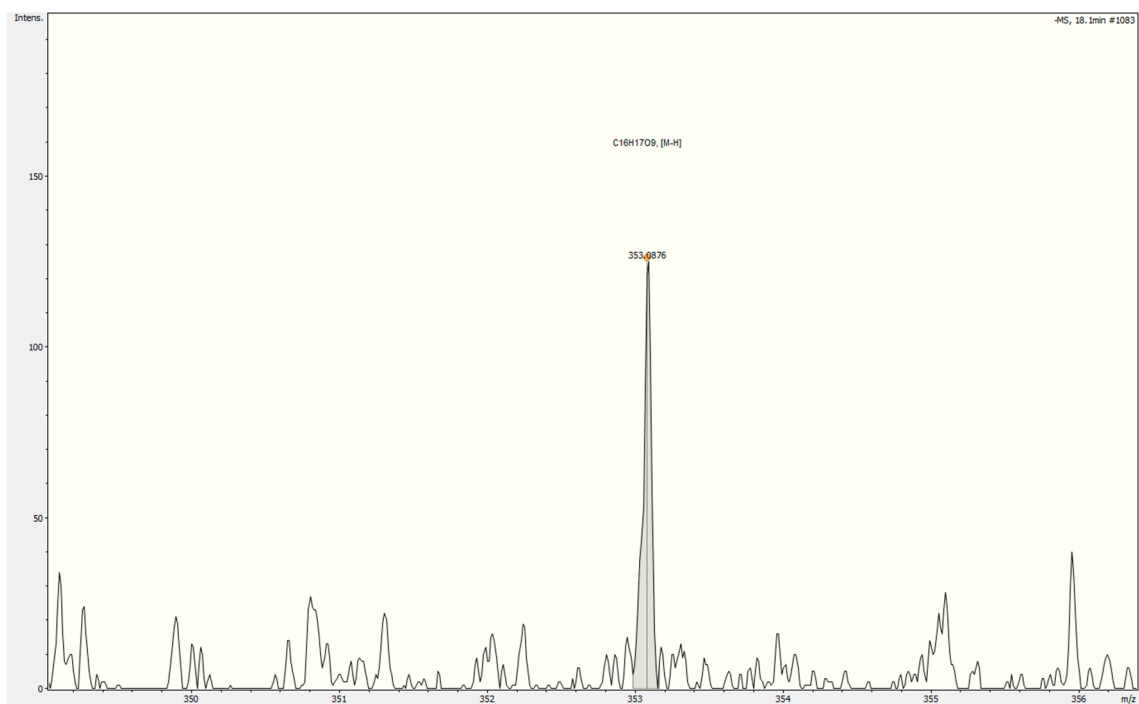

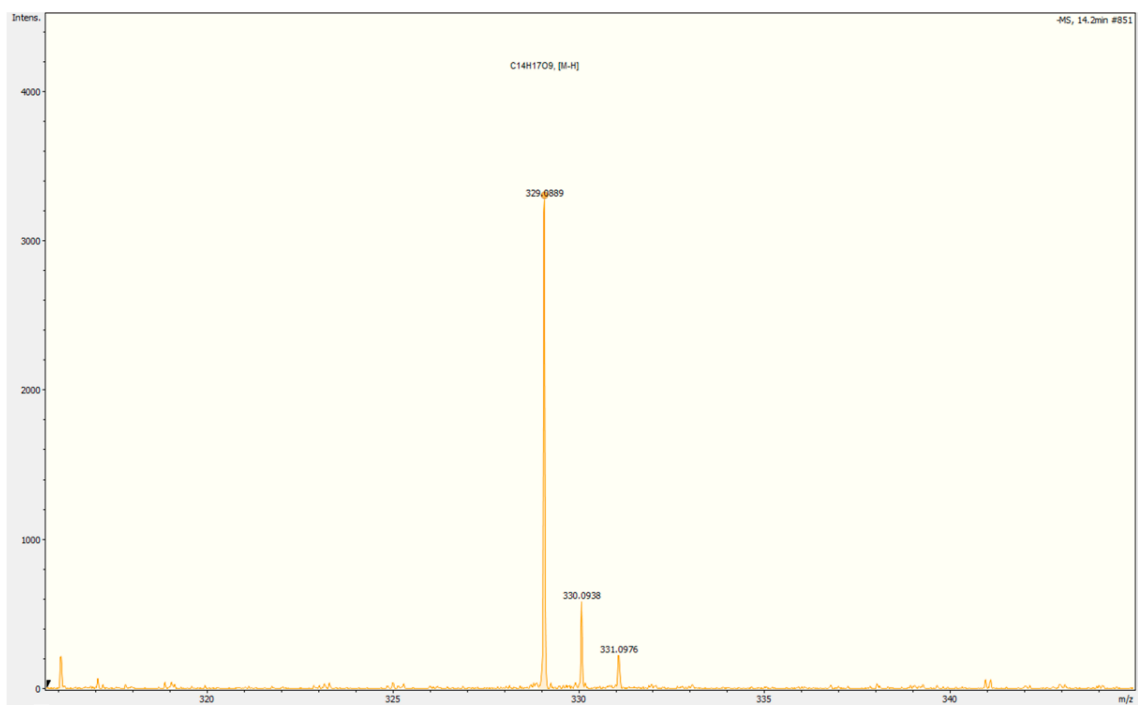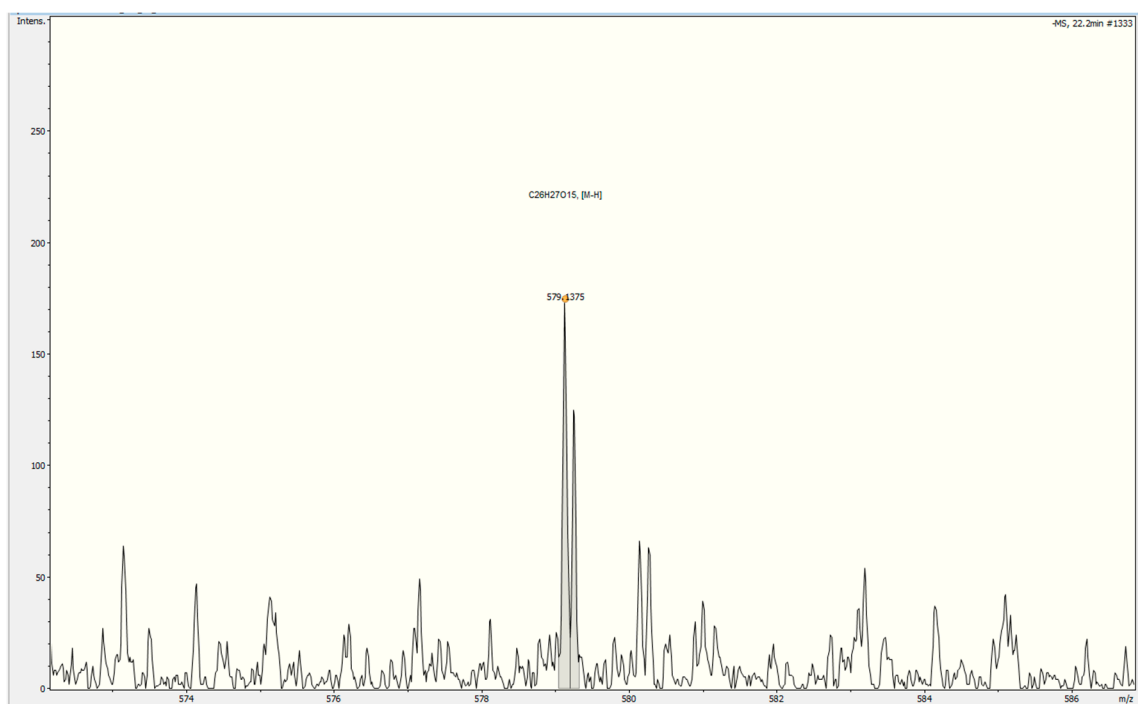

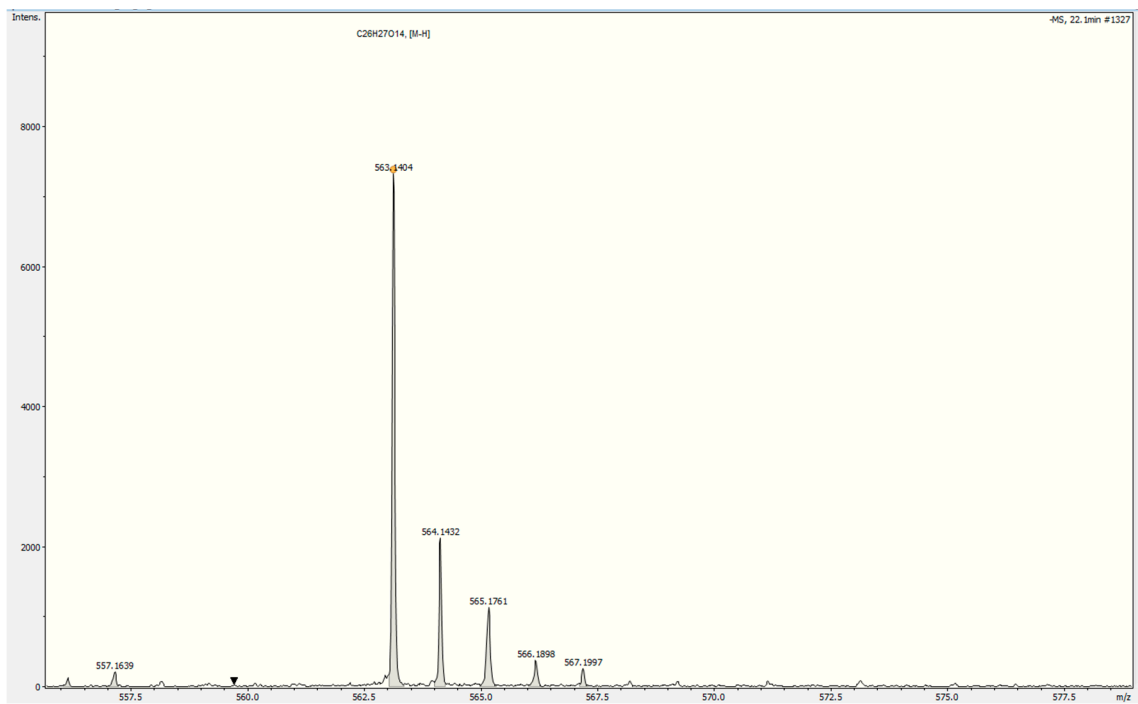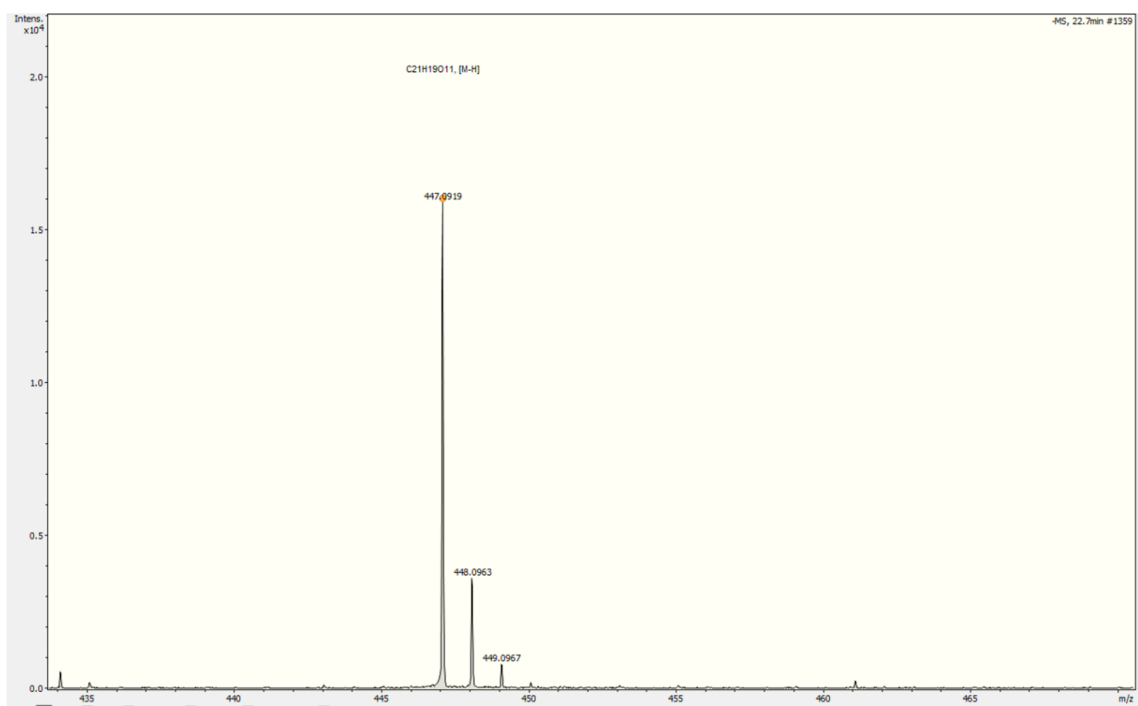



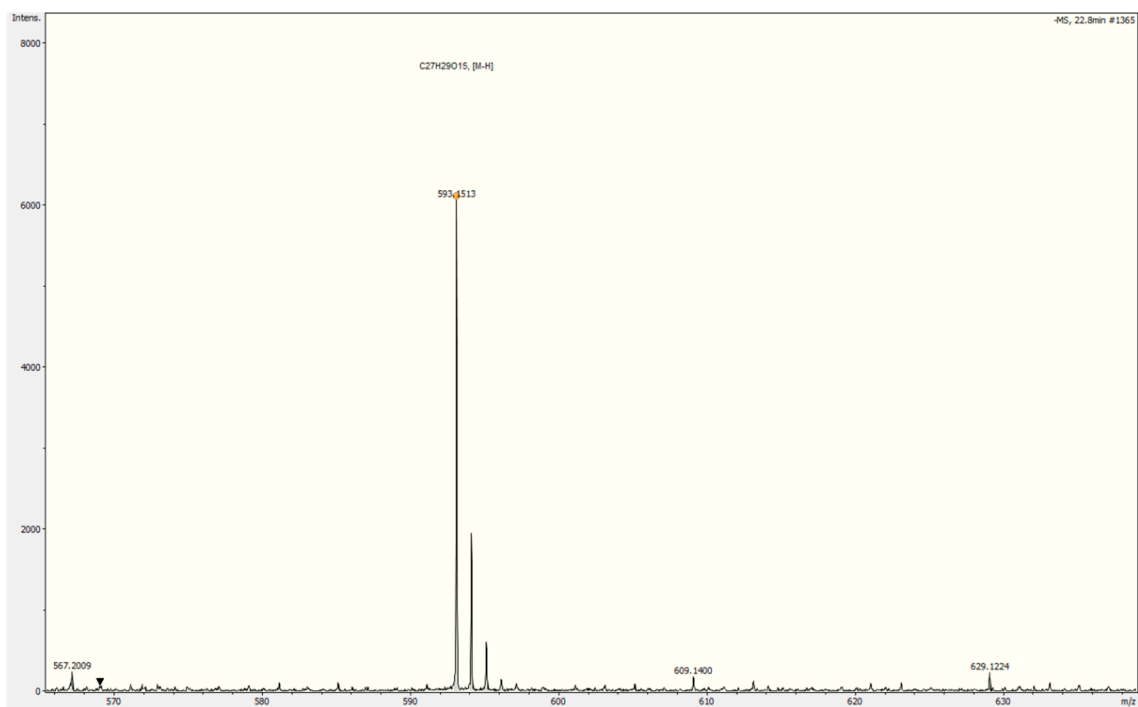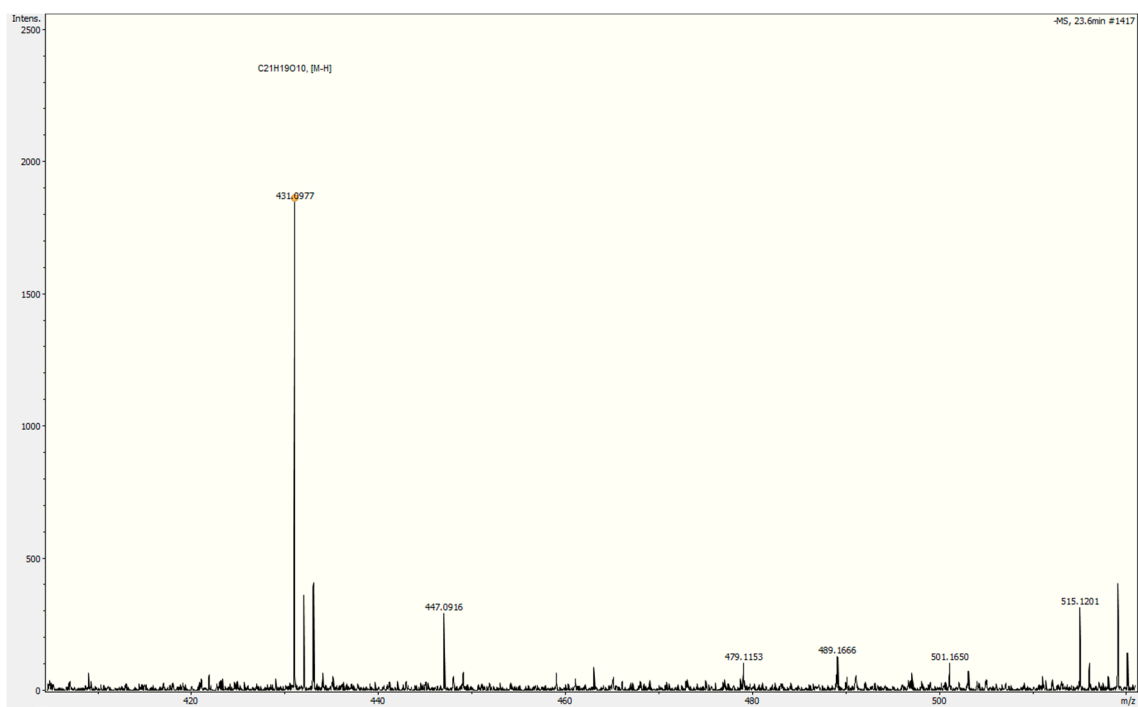

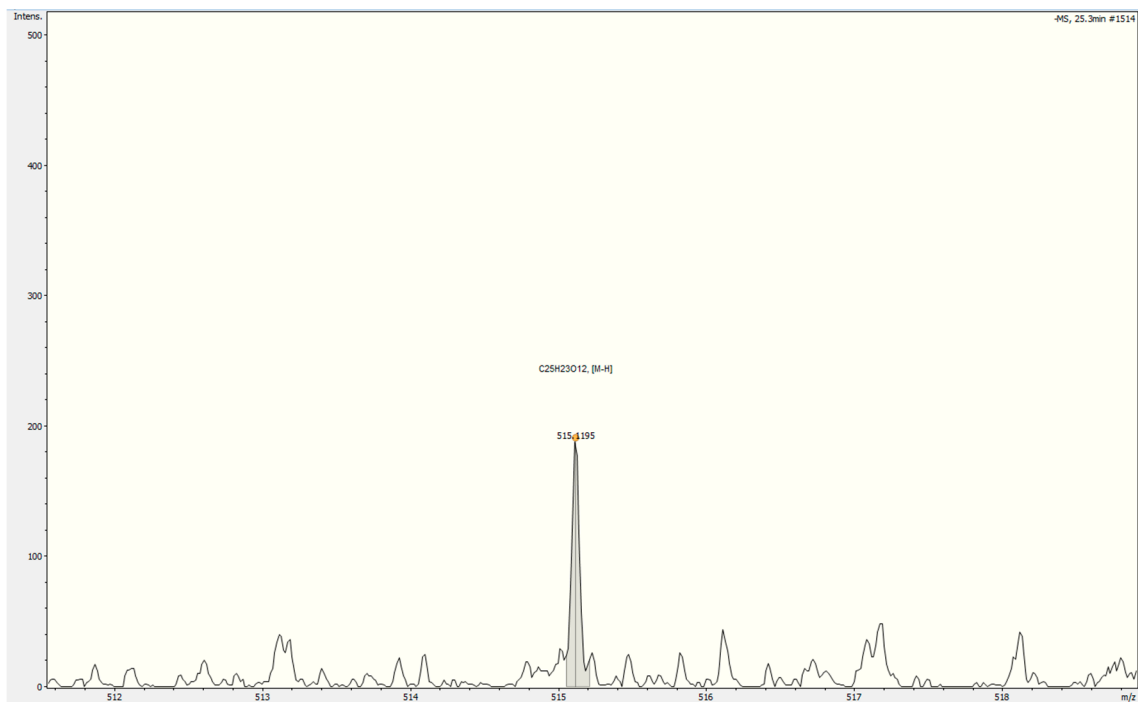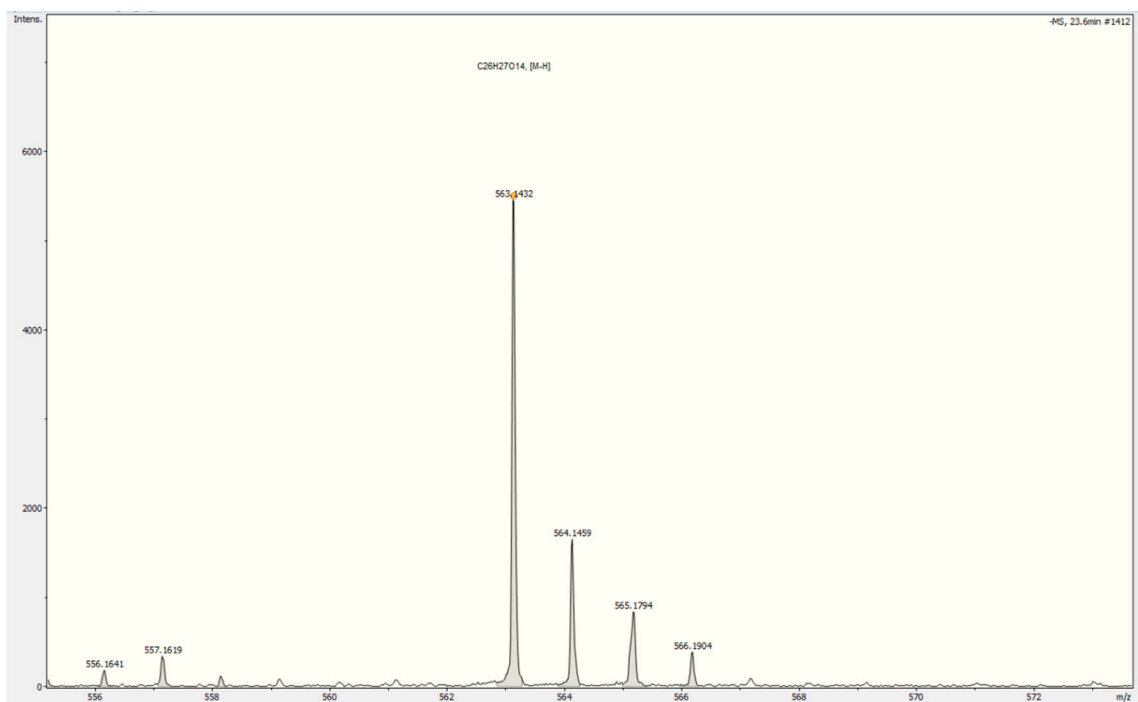

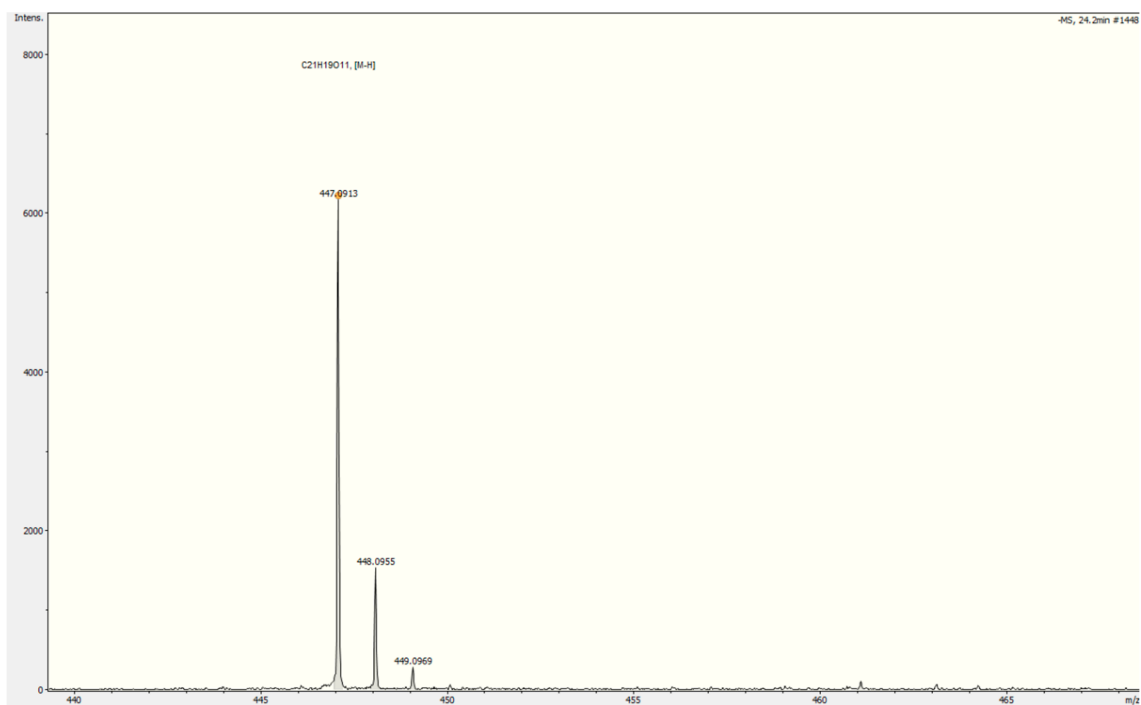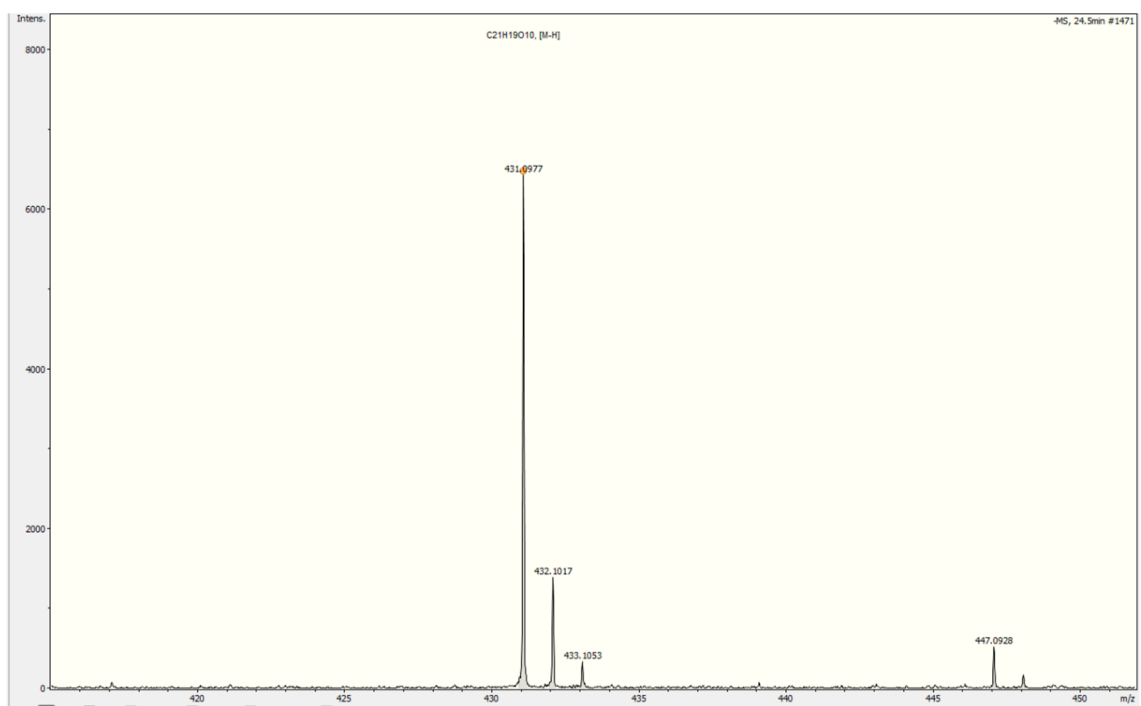

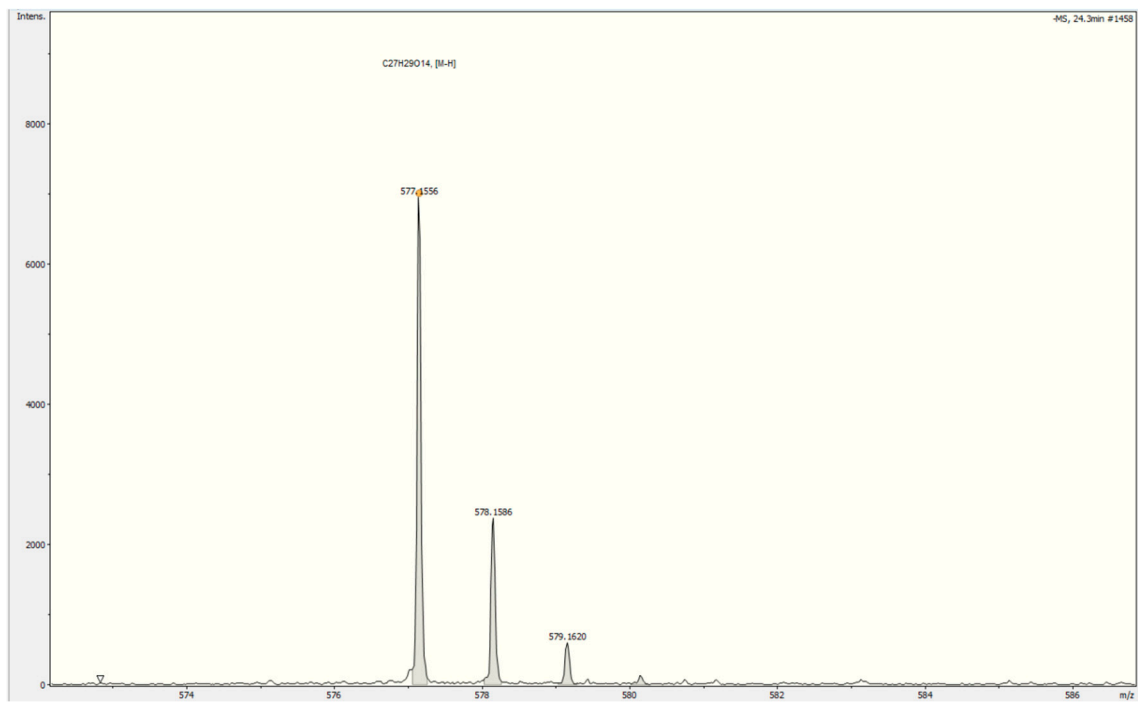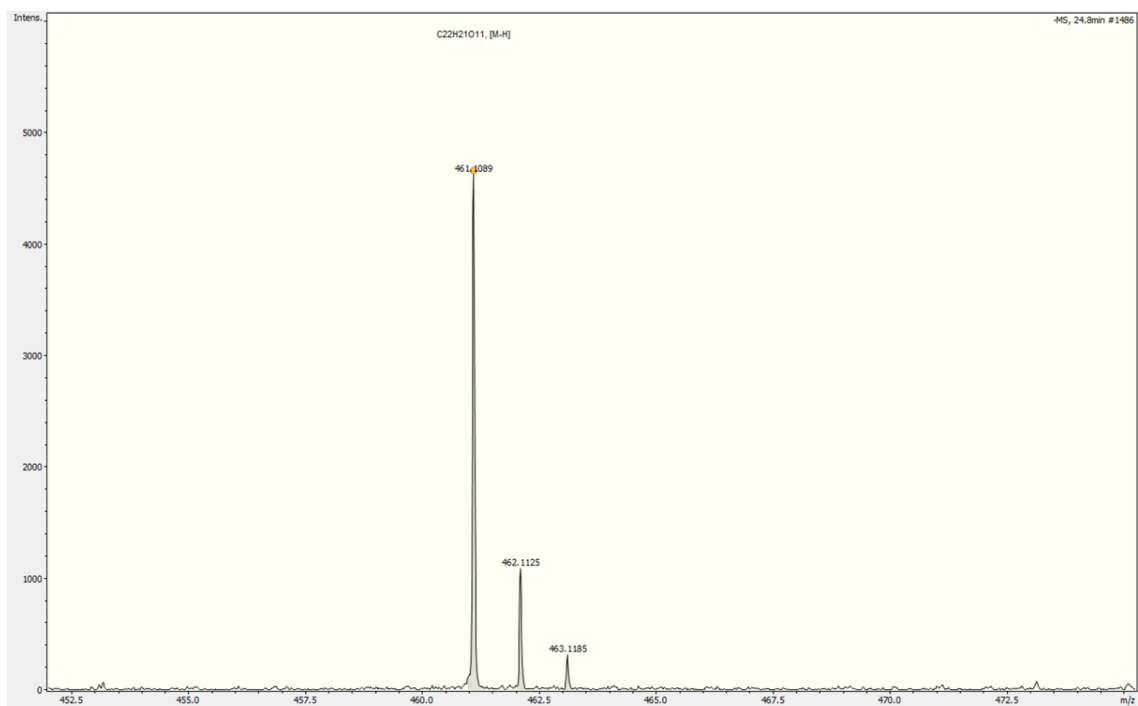

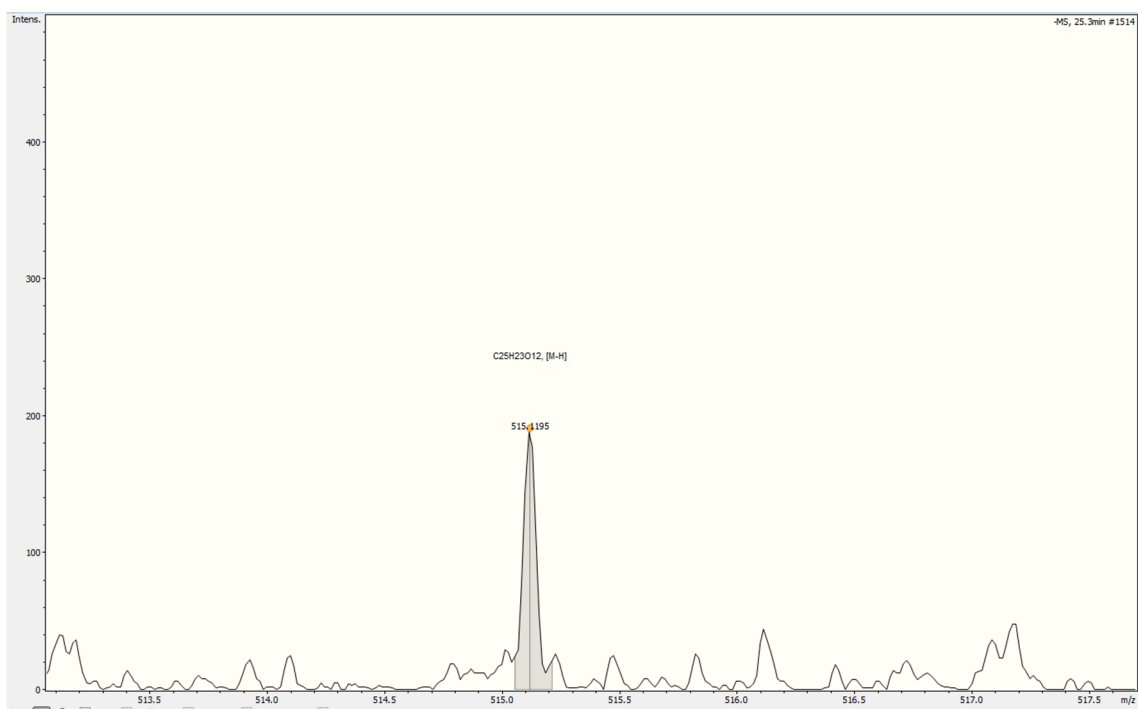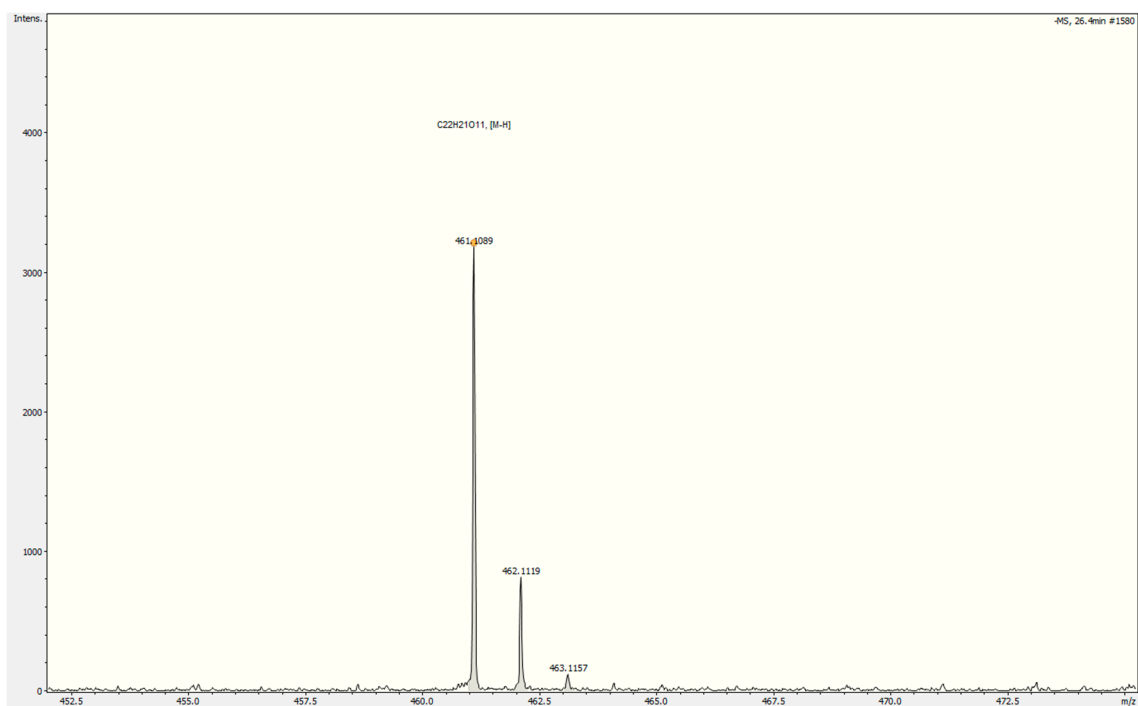

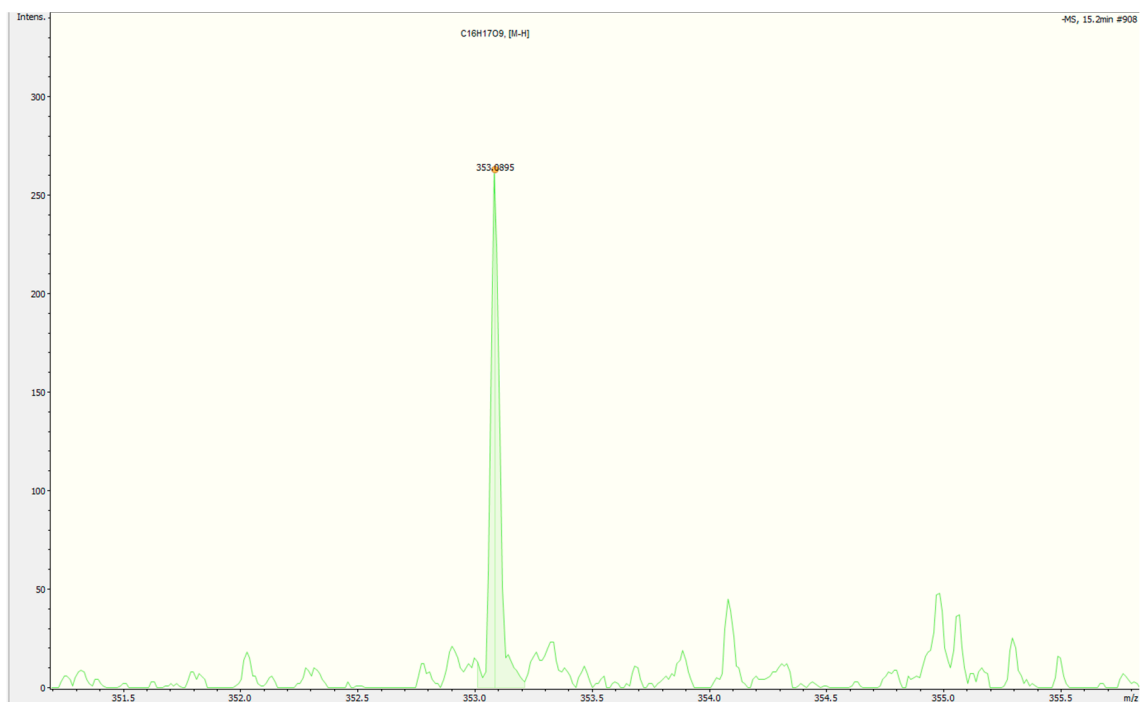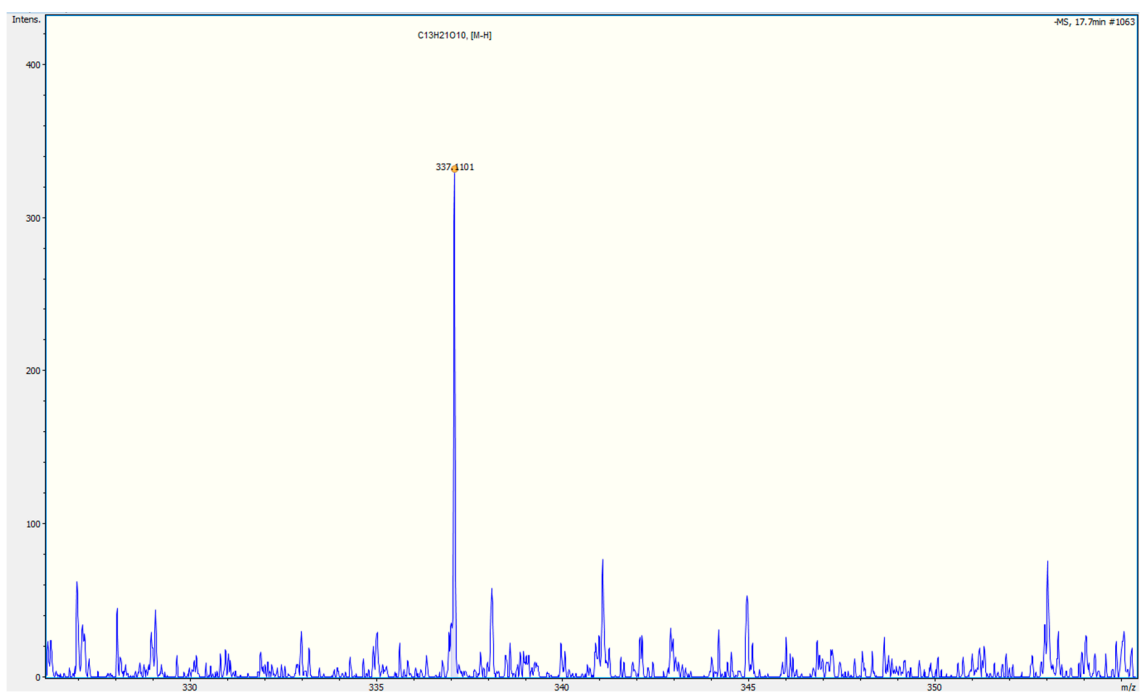

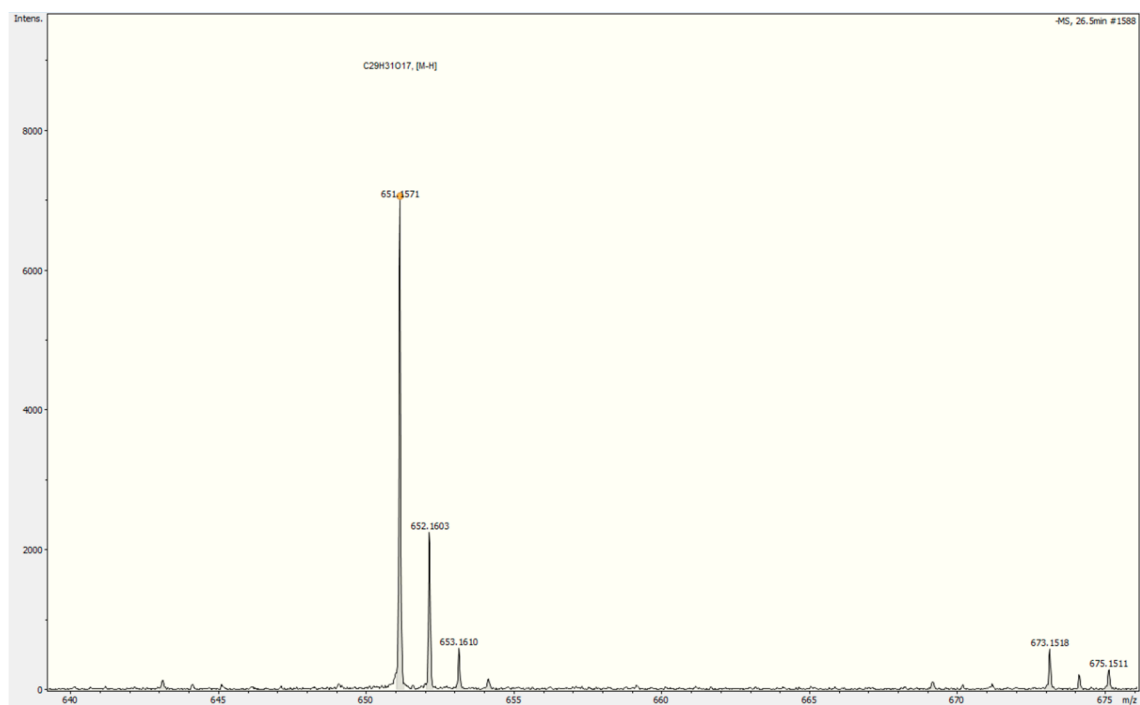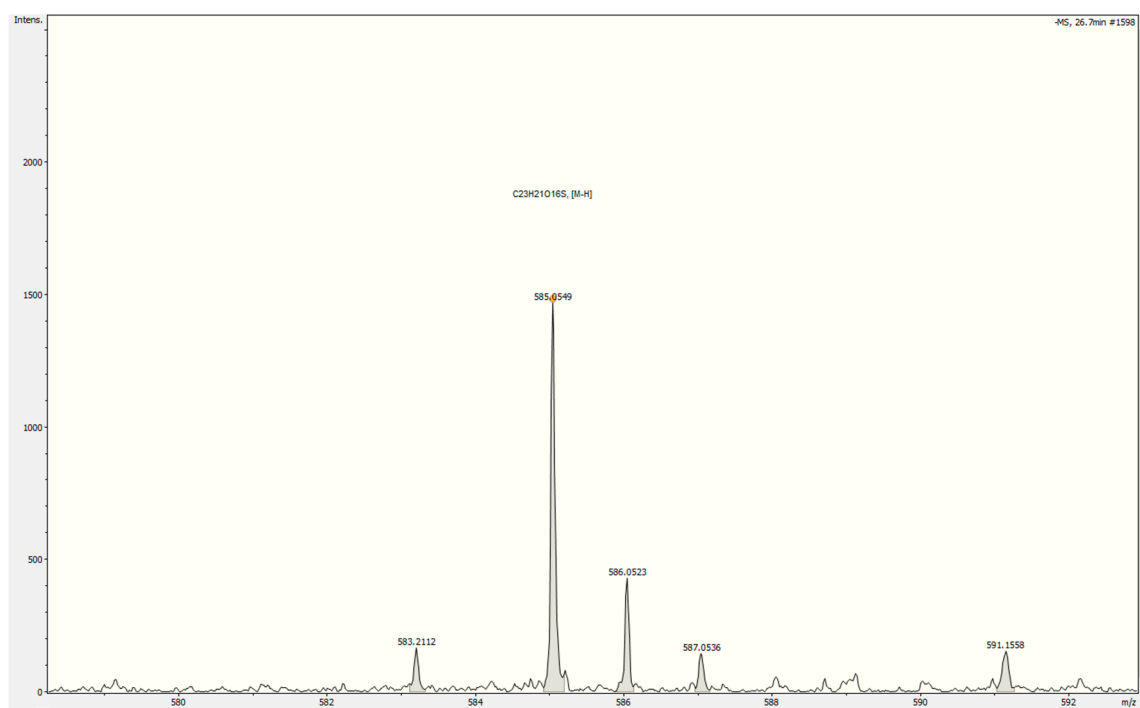

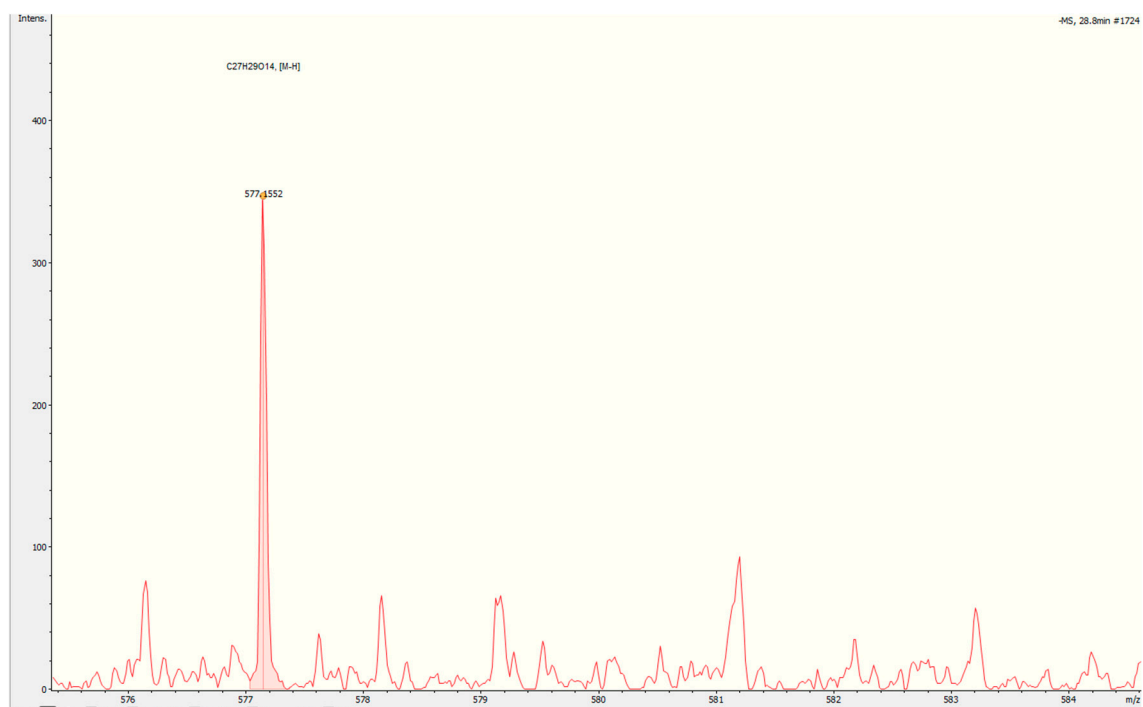

Supplement: s1 [file s1]
